# Supplementary material for: Discrepancy of Growth Toxicity of Polystyrene Nanoplastics on Soybean (Glycine max) and Mung Bean (Vigna radiata)
Source: MDPI journal article supplement (doi:10.3390/toxics12020155), 2024-02-17
Supplement: s1 [file s1]

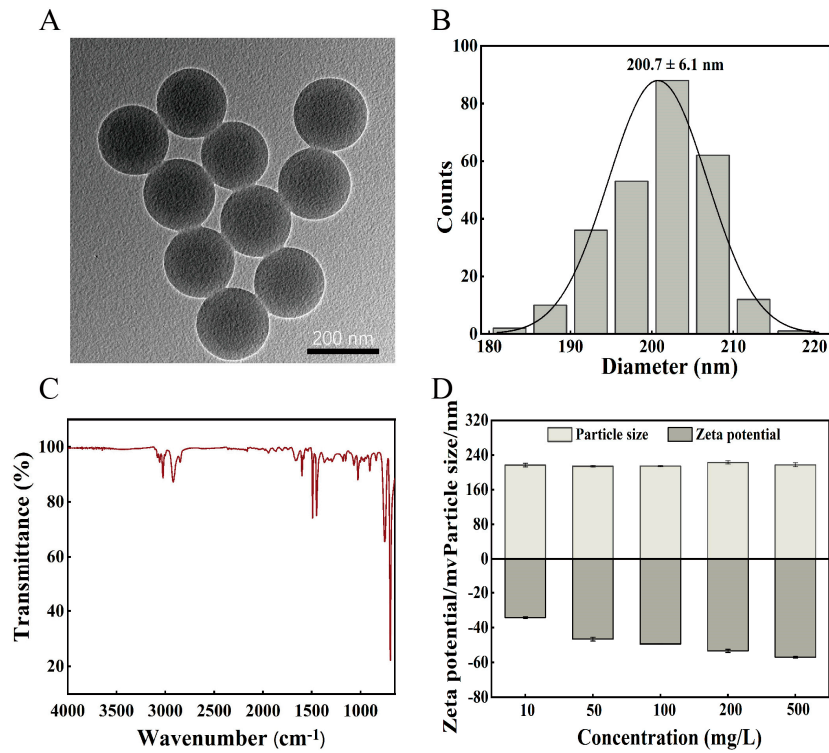

**Figure S1.** Characterization of polystyrene microplastic. TEM images (A), size distribution (B), FTIR spectra (C), Hydrodynamic diameter, and zeta potential in deionized water (D).

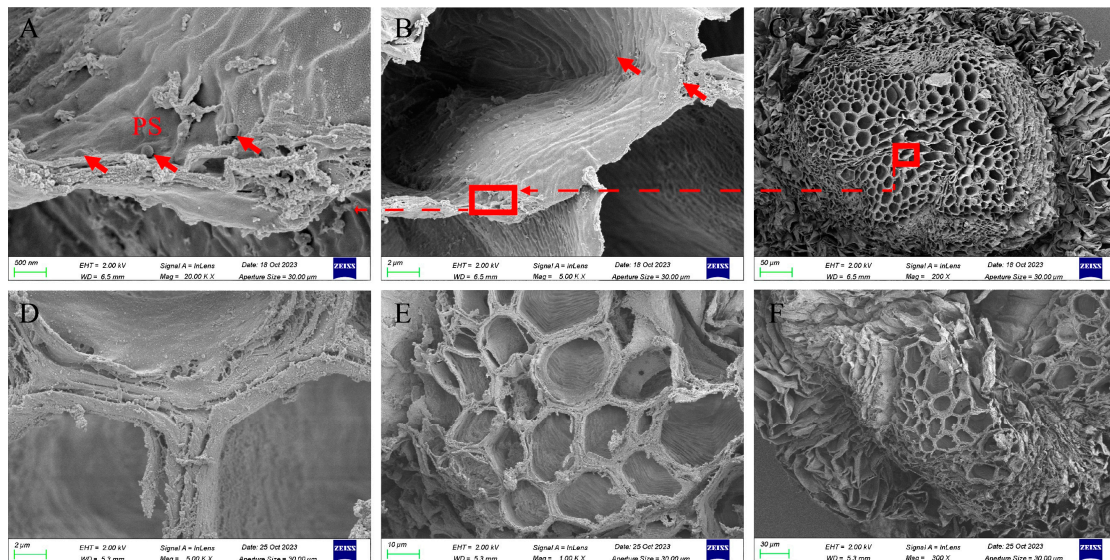

**Figure S2.** Scanning electron microscopy (SEM) images of roots in soybean (A-C) exposed to 50 mg L<sup>-1</sup> polystyrene(PS) nanoplastics for 7 d and the control of mung bean (D-F). Note: (A) and (D) are partial enlargements of (B), and (E) respectively; (B), and (E) are partial enlargements of (C), and (F) respectively.
